# Supplementary material
Source: publisher site journal article supplement (https://www.dovepress.com/article/247368)
Supplement: Supplementary file 1 [file get_supplementary_file.php]

## Supplementary material

S1 File. Stata do file. The Stata do-file can be used in the readers own dataset.

```
use "E:\Users\Kani\AOM_20181003\200311\analysis\cohort3580COPD_kani", clear

keep lprn lessthan5years muerto2011 muerto_raros seninvar_2010 stayer nostayer
lan sex COPD2 CBCOPD ASTMA IMM_2011 SABASAMA_2011 SABASAMA_prev IMM_prev
LABA_2011 ///
LAMA_2011 LABALAMA_2011 LABAICS_2011 LABALAMAICS_2011 age income
income_tertiles18_10 cons

codebook age
*Number of individuals aged 35-80 residing in Sweden by 31 december 2010
*4,994,922

*Keep individuals with an ICDJ43-J44=COPD2

*4,918,895 individuals erased.

tab COPD2
tab CBCOPD
keep if COPD2==1
*CBCOPD 76,027
*COPD2 69,391
*ASTMA 112,263

*keep individuals with previuos inhaled maintenance medication
tab IMM_prev
codebook IMM_prev
keep if IMM_prev==0

**COPD2 52,991 remaining
*
* CBCOPD 55,940

*Erase individuals dead during 2011
tab muerto2011
drop if muerto2011==1

* 3,633 erased
*49,358 remaining

* CBCOPD 52,261 .

*erase late registrations of death
tab muerto_raros
drop if muerto_raros==1

* 7 individuals erased
* 49,351 remaining

* CBCOPD 52,253
```

```

*Erase residing in Sweden less than 5 years
tab lessthan5years
drop if lessthan5years==1
* 330 individuals erased
* 49,021 remaining
* CBCOPD 51,901 remaining

*MISSING VALUES
*age
tab age
codebook age
* 0 missing individuals
* 49,021 individuals remaining

*sex
tab sex
codebook sex
*0 missing individuals
* 49,021 individuals remaining

* income
tab income
codebook income
* missing 381 --> replace missing with 2010 tertiles income value
replace income_ter=3-income_ter
replace income=income_tertiles18_10 if missing(income)
codebook income

* 0 missing
* 49,021 individuals remaining

*county
tab lan
codebook lan
*0 missing individuals

***49,021 individuals left***
save
"E:\Users\Kani\AOM_20181003\200311\analysis\cohort3580COPD_analysis_200319",
replace

****deleting patients with 0 or negative values
use "E:\Users\Kani\AOM_20181003\200311\analysis\cohort3580COPD_analysis_200319"
, clear
keep lprn
cd "E:\Users\Kani\AOM_20181003\200311\analysis"
save idn, replace

forval i=2005 (1) 2010{

```

```

        use "F:\LOMAS2010 (Läkemedel)\Work\Lakemedel\R_`i'.dta", clear

        keep if year(edatum)==`i'
        keep if atc== "R03AC13" | atc== "R03AC18" | atc== "R03AC19" |
atc=="R03AK06" | ///
        atc=="R03AK07" | atc=="R03AK08" | atc=="R03AK10" |
atc=="R03AL03" | atc=="R03AL04" ///
        | atc=="R03AL05" | atc=="R03AL06" | atc=="R03AL07" |
atc=="R03AL08" | ///
        atc=="R03AL09" | atc=="R03BB04" | atc=="R03BB05" |
atc=="R03BB06" | atc=="R03BB07"

        gcollapse (sum) sumantal=antal, by (lprnr)
        keep if sumantal<=0
        cd "E:\Users\Kani\AOM_20181003\200311\analysis"
        save negative_values_`i', replace
        use "E:\Users\Kani\AOM_20181003\200311\analysis\idn", clear
        merge 1:1 lprnr using negative_values_`i'
        drop if _m==2
        drop _m
        save "E:\Users\Kani\AOM_20181003\200311\analysis\idn", replace
    }
drop if sumantal<=0
drop sumantal
save, replace
**2 observations deleted (no prev use of IMM)

**merge IDN with cohort
use "E:\Users\Kani\AOM_20181003\200311\analysis\cohort3580CPD_analysis_200319",
clear
merge 1:1 lprnr using idn
drop if _m==2
drop if _m==1
drop _m
save
"E:\Users\Kani\AOM_20181003\200311\analysis\cohort3580CPD_analysis_200319",
replace

***checking negative values during 2011
cd "E:\Users\Kani\AOM_20181003\200311\analysis"
use "F:\LOMAS2010 (Läkemedel)\Work\Lakemedel\R_2011.dta", clear
keep if year(edatum)==2011
keep if atc=="R03AC12" | atc=="R03AC13" | atc== "R03AC18" | atc== "R03AC19" |
atc=="R03AK06" | ///
atc=="R03AK07" | atc=="R03AK08" | atc=="R03AK10" | atc=="R03AL03" |
atc=="R03AL04" ///
    | atc=="R03AL05" | atc=="R03AL06" | atc=="R03AL07" | atc=="R03AL08" | ///
    atc=="R03AL09" | atc=="R03BB04" | atc=="R03BB05" | atc=="R03BB06" |
atc=="R03BB07"

gcollapse (sum) sumantal=antal, by (lprnr)
keep if sumantal<=0

```

```

cd "E:\Users\Kani\AOM_20181003\200311\analysis"
save "OR_negative_values", replace
use "E:\Users\Kani\AOM_20181003\200311\analysis\cohort3580CPD_analysis_200319",
clear
merge 1:1 lprn using "OR_negative_values"
drop if _m==2

replace IMM_2011=1 if _m==3
drop _m sumantal
save
"E:\Users\Kani\AOM_20181003\200311\analysis\cohort3580CPD_analysis_200319",
replace
***49,019 remaining

*** Create intercategory groups
replace age =2-age
label def agelbl 0 "65-80" 1 "50-64" 2 "35-49"
label val age agelbl
egen ASI= group(age sex income), label

proportion IMM_2011 , over (sex age income ASI)
proportion IMM_2011, over (lan)
/* proportion discontinuation (over ASI) with CI 95%

```

```

_subpop_1: ASI = 65-80 male high
_subpop_2: ASI = 65-80 male Middle
_subpop_3: ASI = 65-80 male low
_subpop_4: ASI = 65-80 female high
_subpop_5: ASI = 65-80 female Middle
_subpop_6: ASI = 65-80 female low
_subpop_7: ASI = 50-64 male high
_subpop_8: ASI = 50-64 male Middle
_subpop_9: ASI = 50-64 male low
_subpop_10: ASI = 50-64 female high
_subpop_11: ASI = 50-64 female Middle
_subpop_12: ASI = 50-64 female low
_subpop_13: ASI = 35-49 male high
_subpop_14: ASI = 35-49 male Middle
_subpop_15: ASI = 35-49 male low
_subpop_16: ASI = 35-49 female high
_subpop_17: ASI = 35-49 female Middle
_subpop_18: ASI = 35-49 female low

```

| _prop_2   |  |          |          |          |          |
|-----------|--|----------|----------|----------|----------|
| _subpop_1 |  | .1764873 | .0064166 | .1642606 | .1894178 |
| _subpop_2 |  | .1774057 | .0049679 | .1678772 | .1873533 |
| _subpop_3 |  | .1879253 | .0051603 | .1780196 | .1982493 |
| _subpop_4 |  | .147398  | .0059456 | .1361213 | .1594366 |
| _subpop_5 |  | .153041  | .0042818 | .1448358 | .1616232 |

|            |  |          |          |          |          |
|------------|--|----------|----------|----------|----------|
| _subpop_6  |  | .1533342 | .0040763 | .1455139 | .1614953 |
| _subpop_7  |  | .2153141 | .0105153 | .1954195 | .2366384 |
| _subpop_8  |  | .2430366 | .0100237 | .2239324 | .2632178 |
| _subpop_9  |  | .2679196 | .0092588 | .2501661 | .2864516 |
| _subpop_10 |  | .1520237 | .0079768 | .1370398 | .1683263 |
| _subpop_11 |  | .1783747 | .007104  | .1648734 | .1927264 |
| _subpop_12 |  | .2151407 | .0073911 | .2010082 | .2299809 |
| _subpop_13 |  | .2956522 | .0425535 | .2194953 | .3851922 |
| _subpop_14 |  | .3478261 | .0375362 | .2782948 | .4245111 |
| _subpop_15 |  | .3659942 | .0258594 | .3169402 | .4179945 |
| _subpop_16 |  | .2352941 | .0514397 | .1494406 | .3501648 |
| _subpop_17 |  | .3224299 | .0319513 | .2632236 | .3879414 |
| _subpop_18 |  | .3177458 | .0161224 | .2870165 | .3501494 |

\*proporion over län

- \_\_subpop\_1: lan = Stockholms län
- \_subpop\_2: lan = Uppsala län
- \_subpop\_3: lan = Södermanlands län
- \_subpop\_4: lan = Östergötlands län
- \_subpop\_5: lan = Jönköpings län
- \_subpop\_6: lan = Kronobergs län
- \_subpop\_7: lan = Kalmar län
- \_subpop\_8: lan = Gotlands län
- \_subpop\_9: lan = Blekinge län
- \_subpop\_10: lan = Skåne län
- \_subpop\_11: lan = Hallands län
- \_subpop\_12: lan = Västra Götalands län
- \_subpop\_13: lan = Värmlands län
- \_subpop\_14: lan = Örebro län
- \_subpop\_15: lan = Västmanlands län
- \_subpop\_16: lan = Dalarnas län
- \_subpop\_17: lan = Gävleborgs län
- \_subpop\_18: lan = Västernorrlands län
- \_subpop\_19: lan = Jämtlands län
- \_subpop\_20: lan = Västerbottens län
- \_subpop\_21: lan = Norrbottens län

|            |  |          |          |          |          |
|------------|--|----------|----------|----------|----------|
| _prop_2    |  |          |          |          |          |
| _subpop_1  |  | .2101117 | .0040682 | .202249  | .2181964 |
| _subpop_2  |  | .1648028 | .0090008 | .1479101 | .1832101 |
| _subpop_3  |  | .1677057 | .0093285 | .1502085 | .1867932 |
| _subpop_4  |  | .1528269 | .0075622 | .1385864 | .1682448 |
| _subpop_5  |  | .1586128 | .0087103 | .1422762 | .1764394 |
| _subpop_6  |  | .1617162 | .0122121 | .1391846 | .1871024 |
| _subpop_7  |  | .1774436 | .0104758 | .1578331 | .1989152 |
| _subpop_8  |  | .2024169 | .022085  | .1625496 | .2491532 |
| _subpop_9  |  | .1811765 | .013211  | .1567065 | .2085226 |
| _subpop_10 |  | .1769978 | .0042581 | .1688056 | .1854987 |
| _subpop_11 |  | .1641497 | .0094915 | .1463826 | .1836095 |
| _subpop_12 |  | .1965112 | .004568  | .1877117 | .2056187 |
| _subpop_13 |  | .1386736 | .010143  | .1199617 | .1597742 |

|            |  |          |          |          |          |
|------------|--|----------|----------|----------|----------|
| _subpop_14 |  | .1740764 | .0094883 | .1562554 | .1934639 |
| _subpop_15 |  | .1888218 | .0107557 | .1686367 | .2108102 |
| _subpop_16 |  | .1728838 | .0101281 | .153924  | .1936445 |
| _subpop_17 |  | .1782032 | .0103846 | .1587506 | .1994743 |
| _subpop_18 |  | .1698984 | .0114116 | .1486865 | .1934489 |
| _subpop_19 |  | .1843854 | .0158055 | .1553938 | .2173937 |
| _subpop_20 |  | .18      | .0113291 | .1588528 | .203282  |
| _subpop_21 |  | .1928375 | .0103536 | .1733521 | .2139462 |

```

-----

*/
save , replace
gen denom=1
collapse (mean) propIMM_2011=IMM_2011 (sum) numerator=IMM_2011 denom, ///
  by(lan ASI cons sex age income) ///
  fast
save "E:\Users\Kani\AOM_20181003\200311\analysis\analysis_aggregated", replace

use "E:\Users\Kani\AOM_20181003\200311\analysis\cohort3580CPD_kani", clear
keep lpnr alderslu
sort lpnr
save "alderslut", replace
use "E:\Users\Kani\AOM_20181003\200311\analysis\cohort3580CPD_analysis_200319",
clear
merge 1:1 lpnr using "alderslut"
keep if _m==3
drop _m

save, replace

*****
*-----*
*MODEL 1* cross classified county & strata
*-----*
*****
cd "E:\Users\Kani\AOM_20181003\200311\analysis"
use "E:\Users\Kani\AOM_20181003\200311\analysis\analysis_aggregated", clear
global MLwiN_path "C:\program files\MLwiN v3.02\mlwin.exe"
order lan ASI numerator denom propIMM_2011
sort lan ASI

**starting values by RIGLS PQL2
runmlwin propIMM_2011 cons, ///
  level3(lan: cons) ///
  level2(ASI: cons) ///
  level1(ASI: ) ///
  discrete(d(binomial) l(logit) denom(denom) pql2) ///
  rigls nopause

* fit by MCMC

```

```

runmlwin propIMM_2011 cons, ///
  level3(lan: cons, residuals(m1ul, savechains("m1lan.dta", replace))) ///
  level2(ASI: cons, residuals(m1ua, savechains("m1ASI.dta", replace))) ///
  level1(ASI: ) ///
  discrete(d(binomial) l(logit) denom(denom)) ///
  mcmc(cc b(5000) c(10000) savechains("m1b.dta", replace)) initsprevious ///
  nopause
estimates store M1

```

```

save "E:\Users\Kani\AOM_20181003\200311\analysis\workingModel_1", replace

```

```

*-----*
* PREPARE FIXED-PART PARAMETER CHAINS -- Model 1
*-----*
cd "E:\Users\Kani\AOM_20181003\200311\analysis"
use "m1b.dta", clear
drop deviance OD_bcons_1
rename FP1_* b1_*
rename RP3_* var1_lan
rename RP2_* var1_strata
format %9.2f b1_* var1_*
compress
save "m1b_prepared.dta", replace
isid iteration
codebook iteration, compact

*-----*
* PREPARE county RANDOM EFFECTS CHAINS -- Model 1
*-----*
cd "E:\Users\Kani\AOM_20181003\200311\analysis"
use "m1lan.dta", clear
drop residual idnum
rename value v1
format %9.2f v1
sort lan iteration
order lan iteration
compress
save "m1lan_prepared.dta", replace
isid lan iteration
codebook iteration, compact

-----*
* PREPARE Strata RANDOM EFFECTS CHAINS -- Model 1
*-----*
cd "E:\Users\Kani\AOM_20181003\200311\analysis"
use "m1ASI.dta", clear
drop residual idnum
rename value u1
format %9.2f u1
sort ASI iteration
order ASI iteration
compress

```

```

save "m1ASI_prepared.dta", replace
isid ASI iteration
codebook iteration, compact
*-----*
* MERGE DATA, FIXED-PART PARAMETER AND RANDOM EFFECTS CHAINS TOGETHER -- Model 1
*-----*
cd "E:\Users\Kani\AOM_20181003\200311\analysis"
use "workingModel_1.dta", clear
isid lan ASI
cross using "m1b_prepared.dta"
sort lan ASI iteration
merge m:1 lan iteration using "m1lan_prepared.dta"
drop if _m==2
drop _m
isid lan ASI iteration
save "m1data_prepped.dta", replace

merge m:1 ASI iteration using "m1ASI_prepared.dta"
drop if _m==2
drop _m
isid lan ASI iteration
compress
save "m1data_prepped.dta", replace

*-----*
*ABSolute risks* Model 1
*-----*
**generate absolute risk prediction for county-level adjusted for socioeconomic
strata
use "m1data_prepped.dta", clear
gen pk=invlogit(b1_cons*cons + v1)
gcollapse (p2.5) pk_lo = pk (mean) pk_mn = pk (p97.5) pk_hi = pk, by(lan)
order pk_mn
sort pk_mn
list lan pk*

/*

```

|    | lan                 | pk_mn    | pk_lo    | pk_hi    |
|----|---------------------|----------|----------|----------|
| 1. | Värmlands län       | .1915128 | .1589099 | .2270184 |
| 2. | Östergötlands län   | .1972514 | .1683686 | .2310522 |
| 3. | Jönköpings län      | .203107  | .1717029 | .2365644 |
| 4. | Uppsala län         | .2077087 | .176239  | .2429643 |
| 5. | Kronobergs län      | .2093434 | .1758691 | .246853  |
| 6. | Hallands län        | .2117124 | .1784835 | .2476448 |
| 7. | Södermanlands län   | .2120799 | .1809129 | .247548  |
| 8. | Västernorrlands län | .213455  | .1800554 | .2503714 |
| 9. | Örebro län          | .2136259 | .1816806 | .2492121 |



|     |                      |          |          |          |
|-----|----------------------|----------|----------|----------|
| 10. | Dalarnas län         | .2159964 | .1832799 | .2514309 |
| 11. | Skåne län            | .2184061 | .1904288 | .2504331 |
| 12. | Kalmar län           | .2194175 | .1859462 | .2572208 |
| 13. | Blekinge län         | .2208856 | .185438  | .2597463 |
| 14. | Gävleborgs län       | .2212304 | .1879507 | .2588649 |
| 15. | Västerbottens län    | .2239033 | .189382  | .261542  |
| 16. | Jämtlands län        | .2253893 | .1889845 | .2659114 |
| 17. | Västmanlands län     | .2266632 | .1918566 | .2648307 |
| 18. | Gotlands län         | .2273669 | .1856868 | .2738401 |
| 19. | Norrbottnens län     | .2354109 | .2006443 | .2738071 |
| 20. | Västra Götalands län | .2420706 | .2117578 | .2762719 |
| 21. | Stockholms län       | .257977  | .2260939 | .2942652 |

/\*\*figure 3 absolute risk county model 1

```

gen pk_rank=_n
gen pk_mncent=100*pk_mn
gen pk_hicent=100*pk_hi
gen pk_locent=100*pk_lo
sort pk_rank pk_mncent
twoway ///
  (scatter pk_mncent pk_rank, mcolor(black) msymbol(circle) msize(small)) ///
  (rspike pk_hicent pk_locent pk_rank, lcolor(black)), ///
  ytitle("Predicted county absolut risks (%) (adjusted)") ///
  ylabel(0(5)55, angle(horizontal) format(%9.2f)) ///
  xtitle("county") ///
  xlabel(1 "Värmland" 2 "Östergötland" 3 "Jönköping" ///
  4 "Uppsala" 5 "Kronoberg" 6 "Halland" 7 "Södermanland" ///
  8 "Västernorrland" 9 "Örebro" 10 "Dalarna" 11 "Skåne" ///
  12 "Kalmar" 13 "Blekinge" 14 "Gävleborg" 15 "Västerbotten" ///
  16 "Jämtland" 17 "Västmanland" 18 "Gotland" 19 "Norrbotten" ///
  20 "Västra Götaland" 21 "Stockholm", angle(vertical) labszsize(vsmall)) ///
  legend(off) scheme(s1mono)

graph export "AR1county.png", replace width(1000)

**generate absolute risk prediction for strata-level adjusted for counties
use "m1data_prepped.dta", clear
gen pj=invlogit(b1_cons*cons+u1)
gcollapse (p2.5) pj_lo = pj (mean) pj_mn = pj (p97.5) pj_hi = pj, by( sex age
income ASI)

list ASI pj*

/*

```

```

+-----+

```

|     | ASI                 | pj_lo    | pj_mn    | pj_hi    |
|-----|---------------------|----------|----------|----------|
| 1.  | 65-80 male high     | .1538118 | .1670674 | .180766  |
| 2.  | 65-80 male Middle   | .1593487 | .1707308 | .1823993 |
| 3.  | 65-80 male low      | .1705583 | .1822321 | .1946208 |
| 4.  | 50-64 male high     | .1852138 | .2058892 | .2276898 |
| 5.  | 50-64 male Middle   | .2124419 | .2338519 | .2546153 |
| 6.  | 50-64 male low      | .2363836 | .2561281 | .276502  |
| 7.  | 35-49 male high     | .1973634 | .2653607 | .3401613 |
| 8.  | 35-49 male Middle   | .25065   | .3158447 | .3875589 |
| 9.  | 35-49 male low      | .2923216 | .3405144 | .3910073 |
| 10. | 65-80 female high   | .1261693 | .1380714 | .1508275 |
| 11. | 65-80 female Middle | .1356818 | .1456054 | .1563751 |
| 12. | 65-80 female low    | .1385361 | .1484732 | .1587844 |
| 13. | 50-64 female high   | .1295231 | .1454701 | .1622274 |
| 14. | 50-64 female Middle | .1576995 | .1723826 | .1887844 |
| 15. | 50-64 female low    | .1918961 | .2071862 | .2230229 |
| 16. | 35-49 female high   | .1440164 | .2178686 | .3050906 |
| 17. | 35-49 female Middle | .2401654 | .2957675 | .355378  |
| 18. | 35-49 female low    | .2735842 | .3046449 | .3383381 |

```

+-----+

```

\*/\*\*figure 4 absolute risk strata model 1

```

gen pj_rank=_n
gen pj_mncent=100*pj_mn
gen pj_hicent=100*pj_hi
gen pj_locent=100*pj_lo
sort sex age income
order sex age income
twoway ///
(scatter pj_mncent pj_rank, mcolor(black) msymbol(smcircle)) ///
(rspike pj_hicent pj_locent pj_rank, lcolor(black)), ///
ytitle("Predicted strata absolut risks (%) (adjusted)") ///
ylabel(0(5)55, angle(horizontal) format(%9.2f)) ///
xtitle("sociodemographic Strata") ///
xlabel(1 "65-80 male high" 2 "65-80 male Middle" 3 "65-80 male low" ///
4 "50-64 male high" 5 "50-64 male Middle" 6 "50-64 male low" 7 "35-49 male
high" ///
8 "35-49 male Middle" 9 "35-49 male low" 10 "65-80 female high" 11 "65-80
female Middle" ///
12 "65-80 female low" 13 " 50-64 female high" 14 "50-64 female Middle" 15
"50-64 female low" ///
16 "35-49 female high" 17 "35-49 female Middle" 18 "35-49 female low", ///
angle(vertical) labsz(vsmall)) ///
legend(off) scheme(s1mono)

graph export "AR1strata.png", replace width(1000)

```

```

***Absolute risks strata&counties model 1
use "m1data_prepped.dta", clear
gen pkj=invlogit(b1_cons*cons+v1+u1)
gcollapse (p2.5) pkj_lo = pkj (mean) pkj_mn = pkj (p97.5) pkj_hi = pkj, by(lan
ASI)
order pkj_mn
sort pkj_mn
list lan ASI pk*

gen pkj_rank=_n
sort pkj_rank pkj_mn
tway //
  (rspike pkj_hi pkj_lo pkj_rank, lcolor(gs13)) ///
  (scatter pkj_mn pkj_rank, mcolor(black) msymbol(smcircle) msize(tiny)), ///
  ytitle("Predicted absolut risks(adjusted)") ///
  ylabel(0(0.05)0.55, angle(horizontal) format(%9.2f)) ///
  xtitle("sociodemographic StrataXlan") ///
  xlabel(0 (50) 372 372) ///
  legend(off) scheme(s1mono)

graph export "AR1model1Strata&county.png", replace width(1000)
*-----*
*VPCs* Model 1
*-----*
**VPC for county-level, adjusted
use "m1data_prepped.dta", clear
gen VPCc= 100*(var1_lan/(var1_lan+var1_strata+((_pi^2)/3)))
gcollapse (p2.5) VPCc_lo=VPCc (mean) VPCc_mn=VPCc (p97.5) VPCc_hi=VPCc
order VPCc_mn
list VPC*

/* VPCc as %

+-----+
| VPCc_mn  VPCc_lo  VPCc_hi |
|-----|
1. | .3519686  .1466865  .7476869 |
+-----+

*/

**VPC for STRATA-level, adjusted
use "m1data_prepped.dta", clear
gen VPCsds= 100*(var1_strata/(var1_lan+var1_strata+((_pi^2)/3)))
gcollapse (p2.5) VPCsds_lo=VPCsds (mean) VPCsds_mn=VPCsds (p97.5)
VPCsds_hi=VPCsds
order VPCsds_mn
list VPC*

/* VPCsds as %

```

```

+-----+
| VPCsds~n  VPCsds~o  VPCsds~i |
+-----+
1. | 4.978777  2.417344  9.633404 |
+-----+

```

```

*/
**VPC for total model 1, adjusted
use "m1data_prepped.dta", clear
gen VPCmodel1= 100*((var1_lan+var1_strata)/(var1_lan+var1_strata+((pi^2)/3)))
gcollapse (p2.5) VPCmodel1_lo=VPCmodel1 (mean) VPCmodel1_mn=VPCmodel1 (p97.5)
VPCmodel1_hi=VPCmodel1
order VPCmodel1_mn
list VPC*

```

```
/* VPCmodel1 as %
```

```

+-----+
| VPCmod~n  VPCmod~o  VPCmod~i |
+-----+
1. | 5.330746  2.766361  9.940882 |
+-----+

```

```

*/
*-----*
*ROC AUC* Model 1
*-----*
use "m1data_prepped.dta", clear
generate phat = invlogit(b1_cons*cons + v1 + u1)
gcollapse (mean) phat, by (lan ASI denom numer)
expand 2
bysort lan ASI : generate y = _n - 1
generate n = .
replace n = denom - numer if y==0
replace n = numer if y==1
roctab y phat [fweight=n], graph summary mcolor(black) scheme(s1mono)
aspectratio(1)
graph export "AUC_modelOne.png", replace width(1000)

/* AUC model 1

```

| Obs    | ROC Area | Std. Err. | -Asymptotic Normal--<br>[95% Conf. Interval] |         |
|--------|----------|-----------|----------------------------------------------|---------|
| 49,019 | 0.5806   | 0.0034    | 0.57401                                      | 0.58720 |

```

*/
use "m1data_prepped.dta", clear
generate phat = invlogit(b1_cons*cons + v1 )
gcollapse (mean) phat, by (lan ASI denom numer)
expand 2
bysort lan ASI : generate y = _n - 1
generate n = .
replace n = denom - numer if y==0
replace n = numer if y==1
roctab y phat [fweight=n], graph summary mcolor(black) scheme(s1mono)
aspectratio(1)
graph export "AUC_model1nelan.png", replace width(1000)
/*AUC model 1 just counties

```

| Obs    | ROC Area | Std. Err. | -Asymptotic Normal--<br>[95% Conf. Interval] |         |
|--------|----------|-----------|----------------------------------------------|---------|
| 49,019 | 0.5351   | 0.0033    | 0.52858                                      | 0.54159 |

```

*/
use "m1data_prepped.dta", clear
generate phat = invlogit(b1_cons*cons + u1 )
gcollapse (mean) phat, by (lan ASI denom numer)
expand 2
bysort lan ASI : generate y = _n - 1
generate n = .
replace n = denom - numer if y==0
replace n = numer if y==1
roctab y phat [fweight=n], graph summary mcolor(black) scheme(s1mono)
aspectratio(1)
graph export "AUC_model1nestrata.png", replace width(1000)
/*AUC model 1 just strata

```

| Obs    | ROC Area | Std. Err. | -Asymptotic Normal--<br>[95% Conf. Interval] |         |
|--------|----------|-----------|----------------------------------------------|---------|
| 49,019 | 0.5670   | 0.0034    | 0.56030                                      | 0.57364 |

```

*/
/*
ROC strata and county on same graph
*/
use "m1data_prepped.dta", clear
generate sociodemographic = invlogit(b1_cons*cons + u1 )
generate county = invlogit(b1_cons*cons + v1 )
gcollapse (mean) sociodemographic count, by (lan ASI denom numer)

```

```

expand 2
bysort lan ASI : generate y = _n - 1
generate n = .
replace n = denom - numer if y==0
replace n = numer if y==1
roccomp y sociodemographic county [fweight=n], graph summary scheme(s1mono)
aspectratio(1) leg(size(small))
graph export "AUC_modelOnestrataLAN.png", replace width(1000)

```

\*\*\*\*\*

**\*\*Sensitivity groupings**

\*sensitivity cross-class 9x25x2 [9 age, 25 income, 2 sex]

```

cd "E:\Users\Kani\AOM_20181003\200311\analysis"
use "E:\Users\Kani\AOM_20181003\200311\analysis\cohort3580CPD_kani", clear
keep lpnr alderslu incomesum
sort lpnr
save "alderslut", replace
use "E:\Users\Kani\AOM_20181003\200311\analysis\cohort3580CPD_analysis_200319",
clear
merge 1:1 lpnr using "alderslut"
keep if _m==3
drop _m
save "E:\Users\Kani\AOM_20181003\200311\analysis\sens-cc", replace

```

```

egen age9= cut (alder), at (35,40,45,50,55,60,65,70,75,81)label
xtile income25= incomesum, nq(25)
keep lpnr lessthan5years muerto2011 muerto_raros seninvar_2010 stayer nostayer
lan sex COPD2 IMM_2011 SABASAMA_2011 SABASAMA_prev IMM_prev LABA_2011 ///
LAMA_2011 LABALAMA_2011 LABAICS_2011 LABALAMAICS_2011 age income alderslut_2010
income25 age9 cons

```

```

save , replace
egen ASI9= group(age9 sex income25), label
tab COPD2
keep if COPD2==1

```

```

tab IMM_prev
codebook IMM_prev
keep if IMM_prev==0

```

```

tab muerto2011
drop if muerto2011==1

```

```

tab muerto_raros
drop if muerto_raros==1

tab lessthan5years
drop if lessthan5years==1

drop if income25==.
*381 deleted
save, replace

gen denom=1
collapse (mean) propIMM_2011=IMM_2011 (sum) numerator=IMM_2011 denom, ///
  by(lan ASI9 cons sex age9 income25) ///
  fast
global MLwiN_path "C:\program files\MLwiN v3.02\mlwin.exe"
order lan ASI9 numerator denom propIMM_2011
sort lan ASI9

**starting values by RIGLS PQL2
runmlwin propIMM_2011 cons, ///
  level3(lan: cons) ///
  level2(ASI9: cons) ///
  level1(ASI9: ) ///
  discrete(d(binomial) l(logit) denom(denom) pql2) ///
  rigls nopause

* fit by MCMC

runmlwin propIMM_2011 cons, ///
  level3(lan: cons, residuals(m19ul, savechains("m1lan9.dta", replace))) ///
  level2(ASI9: cons, residuals(m19ua, savechains("m1ASI9.dta", replace))) ///
  level1(ASI9: ) ///
  discrete(d(binomial) l(logit) denom(denom)) ///
  mcmc(cc b(5000) c(10000) savechains("m1b9.dta", replace)) initsprevious ///
  nopause

save "E:\Users\Kani\AOM_20181003\200311\analysis\sens200417", replace

*-----*
* PREPARE FIXED-PART PARAMETER CHAINS -- Model 1
*-----*
cd "E:\Users\Kani\AOM_20181003\200311\analysis"
use "m1b9.dta", clear
drop deviance OD_bcons_1
rename FP1_* b1_*
rename RP3_* var1_lan
rename RP2_* var1_strata
format %9.2f b1_* var1_*

```

```
compress
save "m1b9_prepared.dta", replace
isid iteration
codebook iteration, compact
```

```
*-----*
```

```
* PREPARE county RANDOM EFFECTS CHAINS -- Model 1
```

```
*-----*
```

```
cd "E:\Users\Kani\AOM_20181003\200311\analysis"
use "m1lan9.dta", clear
drop residual idnum
rename value v1
format %9.2f v1
sort lan iteration
order lan iteration
compress
save "m1lan9_prepared.dta", replace
isid lan iteration
codebook iteration, compact
```

```
-----*
```

```
* PREPARE Strata RANDOM EFFECTS CHAINS -- Model 1
```

```
*-----*
```

```
cd "E:\Users\Kani\AOM_20181003\200311\analysis"
use "m1ASI9.dta", clear
drop residual idnum
rename value u1
format %9.2f u1
sort ASI9 iteration
order ASI9 iteration
compress
save "m1ASI9_prepared.dta", replace
isid ASI9 iteration
codebook iteration, compact
```

```
*-----*
```

```
* MERGE DATA, FIXED-PART PARAMETER AND RANDOM EFFECTS CHAINS TOGETHER -- Model 1
```

```
*-----*
```

```
cd "E:\Users\Kani\AOM_20181003\200311\analysis"
use "sens200417", clear
isid lan ASI9
cross using "m1b9_prepared.dta"
sort lan ASI9 iteration
merge m:1 lan iteration using "m1lan9_prepared.dta"
drop if _m==2
drop _m
isid lan ASI9 iteration
save "m1data9_prepped.dta", replace
```

```
merge m:1 ASI9 iteration using "m1ASI9_prepared.dta"
drop if _m==2
drop _m
isid lan ASI9 iteration
compress
save "m1data9_prepped.dta", replace
```



```

*-----*
*VPCs* Model 1
*-----*
**VPC for county-level, adjusted
use "m1data9_prepped.dta", clear
gen VPCc= 100*(var1_lan/(var1_lan+var1_strata+((_pi^2)/3)))
gcollapse (p2.5) VPCc_lo=VPCc (mean) VPCc_mn=VPCc (p97.5) VPCc_hi=VPCc
order VPCc_mn
list VPC*

/* VPCc as %

```

```

+-----+
| VPCc_mn   VPCc_lo   VPCc_hi |
|-----|
1. | .3803298   .1550018   .8109455 |
+-----+

```

```
*/
```

```

**VPC for STRATA-level, adjusted
use "m1data9_prepped.dta", clear
gen VPCsds= 100*(var1_strata/(var1_lan+var1_strata+((_pi^2)/3)))
gcollapse (p2.5) VPCsds_lo=VPCsds (mean) VPCsds_mn=VPCsds (p97.5)
VPCsds_hi=VPCsds
order VPCsds_mn
list VPC*

/* VPCsds as %

```

```

+-----+
| VPCsds~n   VPCsds~o   VPCsds~i |
|-----|
1. | 2.704777   2.037974   3.535365 |
+-----+

```

```
*/
```

```

**VPC for total model 1, adjusted
use "m1data9_prepped.dta", clear
gen VPCmodel1= 100*((var1_lan+var1_strata)/(var1_lan+var1_strata+((_pi^2)/3)))
gcollapse (p2.5) VPCmodel1_lo=VPCmodel1 (mean) VPCmodel1_mn=VPCmodel1 (p97.5)
VPCmodel1_hi=VPCmodel1
order VPCmodel1_mn
list VPC*

```

```
/* VPCmodel1 as %
```

```
      +-----+
      | VPCmod~n  VPCmod~o  VPCmod~i |
      |-----|
1.   | 3.085107   2.34925   3.984625 |
      +-----+
```

```
*/
```

```
*-----*
```

```
*ROC AUC* Model 1
```

```
*-----*
```

```
use "m1data9_prepped.dta", clear
generate phat = invlogit(b1_cons*cons + u1)
gcollapse (mean) phat, by (lan ASI9 denom numer)
expand 2
bysort lan ASI9 : generate y = _n - 1
generate n = .
replace n = denom - numer if y==0
replace n = numer if y==1
roctab y phat [fweight=n], graph summary mcolor(black) scheme(s1mono)
aspectratio(1)
```

```
/*
```

```
ACU sociodemographic context
```

| Obs    | ROC Area | Std. Err. | -Asymptotic Normal--<br>[95% Conf. Interval] |         |
|--------|----------|-----------|----------------------------------------------|---------|
| 48,638 | 0.5945   | 0.0034    | 0.58793                                      | 0.60115 |

```
*/
```
